1 **Growth behavior and glyphosate resistance level in 10 biotypes of *Echinochloa colona* in**

2 **Australia**

3

4 **Gulshan Mahajan<sup>1\*</sup>, Vishavdeep Kaur<sup>1</sup>, Michael Thompson<sup>1</sup>, Bhagirath S. Chauhan<sup>1</sup>**

5 **<sup>1</sup>Queensland Alliance for Agriculture and Food Innovation (QAAFI), The University of**

6 **Queensland, Gatton 4343, Australia**

7 **[\\*g.mahajan@uq.edu.au](mailto:g.mahajan@uq.edu.au)**

8

9 **Abstract**

10 Recently, poor control of *Echinochloa colona* with glyphosate has been reported in no-till  
11 agriculture systems of the northern grain region (NGR) of Australia. Two experiments were  
12 conducted using 10 biotypes of *E. colona* selected from the NGR of Australia to understand  
13 differences in their growth behavior and resistance pattern. Growth studies revealed that these  
14 biotypes differed in plant height (53-70 cm plant<sup>-1</sup>), tiller production (30-52 tillers plant<sup>-1</sup>),  
15 leaf production (124-186 leaves plant<sup>-1</sup>) and seed head production (37-65 seed heads plant<sup>-1</sup>).  
16 Days taken to seed heads and shoot biomass in these biotypes ranged between 40-48 d and  
17 21-27 g plant<sup>-1</sup>, respectively. Seed production in these biotypes ranged between 5380 and  
18 10244 seeds plant<sup>-1</sup>; lowest for biotype B17/25 and highest for biotype B17/13. Correlation  
19 studies revealed that seed number plant<sup>-1</sup> had a positive correlation with plant height ( $r =$   
20 0.67), tiller number plant<sup>-1</sup> ( $r = 0.89$ ), leaf number plant<sup>-1</sup> ( $r = 0.73$ ), seed heads plant<sup>-1</sup> ( $r =$   
21 0.78), seed head weight ( $r = 0.79$ ), shoot biomass ( $r = 0.77$ ) and root biomass ( $r = 0.46$ ). The  
22 glyphosate dose-response study showed a wide range of responses in these biotypes and the  
23 glyphosate dose required to reduce 50% biomass (GR<sub>50</sub> values) was estimated between 217 to  
24 2159 g a.e. glyphosate ha<sup>-1</sup>. GR<sub>50</sub> values of biotypes B17/16, B 17/34 and B17/35 were 719,  
25 2159 and 884 g ha<sup>-1</sup>, respectively, making them 3, 10 and 4-fold resistant to glyphosate

26 compared with the susceptible biotype B17/37. Growth behavior and seed production  
27 potential in these biotypes had no correlation with the resistance index. These results suggest  
28 that some biotypes of *E. colona* are highly problematic; for example, biotype B17/34 was not  
29 only highly glyphosate-resistant, but also produced a high seed number (9300 seeds plant<sup>-1</sup>).  
30 This study demonstrated that there is a possibility of great risk with the increased use of  
31 glyphosate for managing *E. colona* in the NGR of Australia. The results warrant integrated  
32 weed management strategies and improved stewardship guidelines are required for managing  
33 glyphosate-resistant biotypes of *E. colona* and to restrict further movement of resistant  
34 biotypes to other regions of Australia.

35

36 **Keywords:** Barnyard grass, Herbicide dose, Junglerice, Phenology, Seed number, Weed  
37 biomass

38

### 39 **Introduction**

40 *Echinochloa colona* (L.) Link (C<sub>4</sub> plant) has emerged as a major weed in summer crops in  
41 Australia and competes highly for water, sunlight and nutrients (1, 2). Worldwide, it is rated  
42 among the 10 most troublesome weeds. *E. colona* is widely distributed in the northern grain  
43 region (NGR) of Australia (3, 4, 5) and it costs Australian agriculture AU\$ 14.7 million  
44 annually(6). Therefore, it affects the economy of Australian agriculture enormously.

45 Emergence of multiple cohorts in the summer season, along with high capacity for  
46 seed production and seed dispersal have allowed the spread of *E. colona* throughout the NGR  
47 of Australia. The seeds remain viable in the soil for more than one year, causing continuous  
48 recruitment (7). A significant portion of the fresh seeds of *E. colona* are dormant; therefore,  
49 retention of viability of original seed dispersal caused continuous reinfestation year after  
50 year.

51 In Australia, intraspecific variations in *E. colona* have been reported on the basis of  
52 genetic diversity (8). Such variations are referred to as clone, biotype or ecotype.  
53 Morphological studies of these biotypes may increase our knowledge further and identify  
54 how these biotypes adapt to climate change and play a role in invasiveness. A minor change  
55 in morphology or physiology of the plant may affect its adaptability in a changing climate  
56 and a large number of dispersed seeds in the field, combined with the ability of this weed to  
57 flower under a range of photoperiods, may contribute to its invasiveness (9).

58 In the NGR of Australia, *E. colona* is a very common weed in no-till fallow land and  
59 glyphosate spray is the most common management practice for managing this weed.  
60 Glyphosate was mostly used in orchards (high-value crops) when introduced in Australia  
61 during the 1970s, as it was relatively expensive (10). However, in the 1980s, its price  
62 declined, and its application became a common practice for weed control in a pre-seeding and  
63 fallow situation in Australia, which enabled the growers to adopt the conservation tillage  
64 practice. Glyphosate disrupts the shikimate pathways, reducing aromatic acid production via  
65 inhibition of the chloroplast enzyme, 5-enolpyruvylshikimate-3-phosphate synthase (EPSPS).  
66 Presently, control of some biotypes of *E. colona* in the NGR has become difficult with  
67 glyphosate as it has evolved resistance. The first case of glyphosate-resistant *E. colona* was  
68 reported in the NGR in 2007 (11). At present, 41 weed species have been reported as  
69 glyphosate-resistant worldwide (12). The evolved resistance may be due to intensive and  
70 repeated use of glyphosate (13, 14). *E. colona* has also evolved resistance to four other  
71 herbicide modes of action, in addition to glyphosate (15).

72 A better understanding of the differences between biotypes for control with  
73 glyphosate is essential for developing long-term strategies. Variation in growth,  
74 morphological and physiological characteristics may alter herbicide efficacy within a species.

75 Efficacy of glyphosate can be affected by plant species, biotype, plant development stage and  
76 environmental conditions (16).

77 Further, herbicide-resistant biotypes can spread from one area to another through  
78 pollen, seed or other propagules (17, 18). Therefore, it is important to understand  
79 characteristics of resistant biotypes of a specific area to make better decisions and long-term  
80 strategies for weed control (19, 20). Development of herbicide resistance in biotypes causes  
81 certain biochemical and physiological changes in the plant, which may be different from a  
82 susceptible biotype. A dose-response experiment is often conducted to assess the level of  
83 resistance in different biotypes. The dose-response experiment identifies a dose of a herbicide  
84 that provides a 50% reduction in shoot biomass (21).

85 In the NGR of Australia, there is variability in control of *E. colona* with glyphosate.  
86 We hypothesized that the dose required to reduce 50% growth of the plant (GR<sub>50</sub> value) may  
87 vary between biotypes due to development of different levels of glyphosate resistance. It was  
88 also hypothesized that the reproduction potential of these biotypes may differ due to  
89 variability in the resistance factor. Information on resistant factor, and growth and  
90 reproduction behavior of these biotypes is limited in the NGR of Australia. Keeping these  
91 points in view, this study was planned to evaluate the growth, reproduction behavior and  
92 level of glyphosate resistance in different biotypes of *E. colona*. In this study, one experiment  
93 evaluated the growth and reproduction behavior of 10 biotypes of *E. colona* from the NGR of  
94 Australia and another experiment evaluated the sensitivity of these biotypes to glyphosate.

95

96

## 97 **Results and discussion**

### 98 **Growth and seed production**

99 Amongst biotypes, the final plant height ranged from 53 to 70 cm, where the lowest was  
100 B17/35 and highest was B17/16. Biotypes B17/16, B17/17 and B17/25 attained a similar  
101 height, however, they were taller than biotypes B17/34 and B17/35 (Table 1). Tiller number  
102 among different biotypes ranged between 30 to 52 plant<sup>-1</sup>, where the lowest was B17/25 and  
103 highest was B17/49 (Table 1). Biotypes B17/7, B17/12, B17/13 and B17/49 produced similar  
104 tiller numbers plant<sup>-1</sup>, however, their tiller production was higher than biotypes B17/25 and  
105 B17/35. Leaf numbers in different biotypes varied from 124 to 192 leaves plant<sup>-1</sup>, where the  
106 lowest was biotype B17/16 and highest was biotype B17/34. Leaf production (numbers plant<sup>-1</sup>)  
107 remained similar for biotypes B17/34, B17/35 and B17/49, however, leaf production in  
108 these biotypes was higher than biotypes B17/16 and B17/25. All biotypes produced similar  
109 numbers of seed heads except for B17/25, which produced lower numbers than the other  
110 biotypes (Table 1).

111 The weight of seed heads among different biotypes varied from 6.2 to 9.9 g plant<sup>-1</sup>. It  
112 was similar for biotypes B17/7, B17/12, B17/25, B17/34, B17/35, and B17/37 (6.2 to 7.9 g  
113 plant<sup>-1</sup>), however, these biotypes had a lower seed head weight than biotypes B17/16 (9.8 g  
114 plant<sup>-1</sup>) and B17/49 (9.9 g plant<sup>-1</sup>). Shoot biomass among different biotypes ranged between  
115 20.9 to 27.3 g plant<sup>-1</sup> (Table 1). Shoot biomass remained similar for biotypes B17/13, B17/16  
116 and B17/49, however, in these three biotypes, shoot biomass was significantly higher than  
117 biotypes B17/34, B17/35 and B17/37. Root biomass did not vary among biotypes (Table 1).

118 Time taken to seed head initiation in different biotypes varied from 40 to 48 d.  
119 Biotypes B17/7, B17/12, B17/13, and B17/17 took a similar time for seed head initiation (40-  
120 42 d) and produced seed heads earlier than biotypes B17/16, B17/25 and B17/35, of which  
121 B17/35 took the longest (48 d). Seed production in different biotypes varied from 5380 to  
122 10244 seeds plant<sup>-1</sup>; where the lowest was biotype B17/25 and highest was biotype B17/13.

123 Biotypes B17/12, B17/13, B17/34 and B17/49 produced a similar number of seeds (8298-  
124 10244 plant<sup>-1</sup>), with their seed production being higher than biotypes B17/25 and B17/35.

125 A linear positive correlation was found for seed number with plant height ( $r = 0.67$ ),  
126 tiller number plant<sup>-1</sup> ( $r = 0.89$ ), leaf number plant<sup>-1</sup> ( $r = 0.73$ ), seed heads plant<sup>-1</sup> ( $r = 0.78$ ),  
127 seed head weight ( $r = 0.79$ ), shoot biomass ( $r = 0.77$ ) and root biomass ( $r = 0.46$ ) (Table 2).  
128 Shoot biomass had a negative relation with days taken to seed head initiation ( $r = -0.54$ )  
129 (Table 2). Plant height, tiller production and seed head weight also had a negative relation  
130 with days taken to seed head initiation. Root biomass had a positive correlation with tiller  
131 production, leaf production and shoot biomass.

132 The results of this study demonstrated that characteristics like tall nature and high  
133 tillering capacity allow *E. colona* biotypes to produce a high leaf number that resulted in a  
134 large number of seed heads and seeds. Therefore, there is a need to target tiller production in  
135 *E. colona* to reduce seed numbers. A recent study on crop-weed interference suggested that  
136 crop competition could reduce tiller numbers in *E. colona* (22). In Australia, farmers are  
137 following wide and skip row spacing in crops such as cotton (*Gossypium hirsutum* L.),  
138 mungbean [*Vigna radiata* (L.) R. Wilczek] and sorghum [*Sorghum bicolor* (L.) Moench];  
139 therefore, wide space between the rows could provide a better opportunity to *E. colona*  
140 biotypes with a high tillering capacity nature as compared to when crops are sown in narrow  
141 rows. In these environments (wide rows and fallows), *E. colona* could attain its high tillering  
142 potential and could produce a high seed number. *E. colona* in the present study produced  
143 tillers in the range of 39 to 52 plant<sup>-1</sup>; however, in a previous study conducted in Greece, it  
144 produced tillers in the range of 115 to 131 plant<sup>-1</sup> (23). This difference could be due to  
145 genotype x environment interactions and differential pot size. In the present study, we  
146 observed that biotypes B17/13 and B17/49 had higher tillers than biotypes B17/25 and B  
147 17/35. This also suggested that genotypes and environmental interactions played a role in

148 influencing tiller numbers per plant in *E. colona* biotypes. The regions where biotypes are of  
149 high tillering capacity are expected to suffer a high crop yield loss due to high *E. colona*  
150 competition.

151         The high seed number observed in biotypes B17/12, B17/13, B17/34 and B17/49 was  
152 largely attributed to a high number of tillers, leaves, and seed heads. Our study also revealed  
153 that seed head weight also influences seed number. The number of leaves and seed heads  
154 were similar between biotypes B17/13 and B17/35; however, seed production was lower in  
155 B17/35, which could be due to the lower tiller production and seed head weight in B17/35.  
156 The time taken to seed head initiation in the present study was similar to a study conducted in  
157 northern Greece, in which *E. colona* attained seed heads between 39 to 45 days after  
158 transplanting (23). The biotype B17/35 (selected from the Moree region) took a longer time  
159 for seed head initiation than other biotypes (Figure 1). In a previous study in South-East Asia,  
160 12 *E. colona* biotypes were studied and it was found that time for seed heads in different  
161 biotypes varied with latitude and plants from a high latitude attained seed heads earlier than  
162 from a low latitude (24). This suggested that growth duration in different biotypes of *E.*  
163 *colona* may vary with geographical location. In the present study, the negative relationship  
164 between seed head initiation and seed number revealed that late-maturing biotypes produced  
165 fewer seeds as was the case for biotypes B17/16 and B17/35 when compared with biotype  
166 B17/13. Time taken to seed head initiation also had a negative relationship with plant height,  
167 tiller number, and shoot biomass. These results suggest that diversity in *E. colona* traits could  
168 result in differential responses to herbicides, cultural practices, and resistance evolution. For  
169 example, the early vigor trait in *E. colona* is an important trait that could affect early crop-  
170 weed competition (25) and therefore, management of such biotypes at an early stage is  
171 required to increase crop production and reduce the weed seed bank in the soil.

172 In this study, *E. colona* biotypes differed in their seed production potential, which  
173 ranged between 5380 to 10240 seeds plant<sup>-1</sup>. Differential seed production in *E. colona*  
174 biotypes could play an effective role in its spread and population establishment (26). High  
175 seed yields in biotypes B17/12, B17/13, B17/34 and B17/49 were largely based on a greater  
176 number of seed heads and leaf numbers plant<sup>-1</sup>. High production of leaves in these biotypes  
177 probably maintained a better supply rate of carbon assimilates to seeds. In one study on  
178 *Brassica*, it was found that variation in the supply of carbon assimilates to seeds at or  
179 immediately after anthesis could cause a variation in seed production in different biotypes  
180 (27). Some authors also highlighted the role of the supply of carbon assimilates in  
181 determining the seed number in pea (*Pisum sativum* L.) plant (28).

182 The present study also revealed that tiller number per plant played a large role in seed  
183 production along with leaf number per plant. Biotype B17/35 had high leaf production but  
184 could not produce higher amounts of seeds like B17/13 and B17/34 did, because it had lower  
185 tiller production than B17/13 and B17/34. Although this study revealed that the supply of  
186 carbon assimilates after anthesis could be a major factor in determining seed production, we  
187 could not rule out the possibility of hormonal factors for variation in seed production in these  
188 biotypes. These results suggest that there is also a need to study nutritional and hormonal  
189 factors for variation in seed production in these biotypes (27). Our study (second experiment)  
190 also found that the GR<sub>50</sub> value of glyphosate for these biotypes varied. These results suggest  
191 that in these biotypes, seed viability, seed persistence and fitness penalty may differ and  
192 therefore systematic studies need to be investigated. Such knowledge of seed production in  
193 these biotypes is required for understanding the evolution and spread of herbicide resistance  
194 particularly for herbicide-resistant biotypes.

195

196



## 197 **Response to glyphosate**

198 Out of 10 *E. colona* biotypes collected from the NGR of Australia, three biotypes (B17/16, B  
199 17/34 and B17/35) had greater than 80% survival following treatments with 325 to 2600 g  
200 a.e. ha<sup>-1</sup> glyphosate. The probit analysis details for each biotype along with their level of  
201 significance is presented in Table 3. The dose-response study of glyphosate for these biotypes  
202 showed a wide range of responses (Figure 2). The GR<sub>50</sub> value of the tested biotypes ranged  
203 from 217 to 2159 g ha<sup>-1</sup> (Figure 2). The susceptible biotype B17/37 was easily controlled  
204 with glyphosate and had a GR<sub>50</sub> of 217 g ha<sup>-1</sup>, below the normal use rate of this herbicide  
205 (650 g ha<sup>-1</sup>). The GR<sub>50</sub> values of biotypes B17/16, B17/34 and B17/35 were 719, 2159 and  
206 884 g ha<sup>-1</sup>, respectively, making them 3, 10 and 4-fold resistant to glyphosate compared with  
207 the susceptible biotype B17/37. The most resistant biotype B17/34 was from the  
208 Goondiwindi region, whereas the next most resistant biotypes, B17/35 and B17/16, were  
209 from the Moree and Narrabri regions, respectively. This study has revealed that *E. colona*  
210 biotypes in the NGR of Australia have different levels of resistance to glyphosate. No-till  
211 farming is quite popular in the NGR of Australia for moisture conservation. Therefore,  
212 growers use glyphosate in summer fallows to kill weeds and conserve moisture. Repeated and  
213 intensive use of glyphosate in this region has evolved glyphosate resistance in these biotypes  
214 (11). Risk of glyphosate resistance evolution for weeds is higher in those areas where  
215 glyphosate has been used for a long time and with minimal soil disturbance (29). In Australia,  
216 glyphosate-tolerant cotton varieties are very popular among cotton growers. Glyphosate-  
217 resistant *E. colona* biotypes may create serious situations in that production environment. The  
218 resistant factor for glyphosate in this study was similar to the first reported case of glyphosate  
219 resistance in Australia (7 to 11-fold resistance compared with a susceptible population); but  
220 that study was reported for rigid ryegrass (*Lolium rigidum* Gaud.) (30).

221 Earlier, glyphosate resistance in *E. colona* biotypes was also reported in Australia (11,  
222 31). There are a number of mechanisms responsible for glyphosate resistance (32), and  
223 different mechanisms may result in a different level of resistance (33). Therefore, these  
224 studies suggests that these resistant biotypes may not carry the same resistance allele, which  
225 needs to be investigated. Many reports of glyphosate resistance in different weeds highlight  
226 that the reliance on glyphosate for weed control, in the long run, exerts a substantial selection  
227 pressure on weeds (34,35,36,37,38,39,40). Therefore, integrated weed control should be  
228 strengthened to reduce selection pressure on these resistant biotypes, particularly in cotton  
229 paddocks. It is quite possible that the mechanism of glyphosate resistance in Australian *E.*  
230 *colona* biotypes might be different from resistant *E. colona* biotypes reported from California  
231 (41) as Australian biotypes of *E. colona* have adapted to a dry environment. Therefore, a  
232 systematic study is required to understand the evolution of glyphosate resistance in these  
233 biotypes. The evolution of glyphosate resistance in tropical *E. colona* in Australia suggests  
234 that there is a large risk with increased use of glyphosate in fallows and improved  
235 stewardship guidelines for glyphosate use are required in the NGR of Australia.

236 The present study on *E. colona* biotypes has increased our understanding of the  
237 physiological basis of differences in seed production due to variations in morphological  
238 characteristics and resistance behavior. It highlighted that growth parameters such as high  
239 tiller production in *E. colona* biotypes leads to more leaves and in turn high seed production.  
240 The study further demonstrated that growth behavior and seed production potential in these  
241 biotypes had no correlation with the resistance index. However, this research has posed more  
242 questions than it has answered. This study suggested that biotypes such as B17/34 that are  
243 highly glyphosate-resistant, and also produced a high seed number (9300 seeds plant<sup>-1</sup>) are  
244 very problematic. Therefore, systematic research on weed biology, physiology and resistance  
245 mechanism is required to answer these questions for better understanding. This study also

246 suggested that there is a need to understand the likelihood of resistance transfer from resistant  
247 to susceptible biotypes through pollen-mediated gene flow and introgression. Such  
248 knowledge could be useful in restricting the further spread of glyphosate-resistant biotypes of  
249 *E. colona*.

## 250 **Materials and methods**

251 The study was conducted at the QAAFI weed science laboratory and screen house of the  
252 University of Queensland, Gatton, Australia. Seeds of 10 different biotypes of *E. colona* were  
253 collected from the NGR of Australia in March 2017. The coordinates of these biotypes are  
254 depicted in Figure 1. The seeds of each biotype were cleaned and stored in shade.

255

## 256 **Growth response experiment**

257 In this experiment, 10 biotypes of *E. colona* were grown in pots replicated four times. The  
258 pots were kept on benches placed outside the screen house. Pots were filled with potting mix  
259 (Crasti & Company Pty Ltd, Sydney, Australia). Initially, 10 seeds were sown per pot at 1 cm  
260 depth and after establishment, one plant per pot was maintained. The experiment was  
261 conducted twice. The first run was started on 27 September 2018 and harvested on 6  
262 December 2018. The second run was started on 3 December and harvested on 5 February  
263 2019. Pots used in the experiment were 20 cm in height and arranged in a completely  
264 randomized design. The pots were regularly irrigated.

265 At maturity, plant height was measured from the base of the plant to the tip of the  
266 uppermost leaf of the plant. Days taken to seed head initiation was recorded in each pot. For  
267 estimating seed production per head, two intact seed heads were chosen randomly from each  
268 plant. For the total number of seeds, each rachilla segment (pedicel base) was counted and  
269 then, averaged for seeds per head. At harvesting time, tiller numbers, leaf numbers and seed  
270 heads per plant were also counted. Harvesting was done when ~80% seed heads matured.

271           At harvest, seed heads were separated from the plants for measuring shoot biomass.  
272    After that, all aboveground shoot biomass from each plant was placed separately in a paper  
273    bag and dried in an oven at 70 °C for 72 hours before being weighed. For root weight data,  
274    pots containing potting mix with the root system were first dried in an oven at 70 °C for 72  
275    hours. After that, roots were removed from each pot by shaking. Root biomass of each plant  
276    was then measured. Drying of potting mix in an oven helped in the separation of the root  
277    system from the potting mix.

278

### 279    **Glyphosate dose-response experiment**

280    Seeds of 10 biotypes were sown in pots (9 cm diameter and 10 cm height) filled with potting  
281    mix (Crasti & Company Pty Ltd, Sydney, Australia). Initially, 10 seeds were sown per pot at  
282    1 cm depth and after establishment, five plants per pot were maintained. Pots were kept in a  
283    screen house under natural light and temperature conditions. The experimental design was a  
284    factorial with four replicates where the first factor was biotype and the second factor was  
285    glyphosate dose [0x (no herbicide; control), 0.5x, 1x, 2x, and 4x]. The 1x dose was the  
286    recommended dose (650 g a.e. ha<sup>-1</sup>) for glyphosate. The experiment was conducted twice.  
287    The first run was started on 5 December 2018 and harvested on 14 January 2019. The second  
288    run was started on 25 January 2019 and harvested on 6 March 2019. Glyphosate application  
289    was done on 24 December 2018 in the first run and 13 February 2019 in the second run.  
290    Plants were kept well-watered and fertilized.

291           Glyphosate was sprayed using a research track sprayer. Plants were treated at the 4-5  
292    leaf stage using a spray volume of 108 L ha<sup>-1</sup> and Teejet XR 110015 flat fan nozzles were  
293    used. Plants were allowed to grow for 21 days after treatment (DAT) to determine glyphosate  
294    sensitivity. Plant survival was assessed 21 DAT, and plant aboveground biomass was  
295    harvested, dried for 72 hours at 70 °C, and weighed.

296

## 297 **Statistical analyses**

298 The first experiment was conducted in a completely randomized design and the second  
299 experiment was conducted in a completely randomized design with a factorial arrangement.  
300 In both experiments, there was no interaction between experimental runs and treatments;  
301 therefore, the data of the two runs were pooled for ANOVA. All the data met assumptions of  
302 normality of residuals and homogeneity of variance. Data of the first experiment were  
303 subjected to analysis of variance (ANOVA) using the software Elementary Designs  
304 Application 1.0 Beta (AgriStudy. com: [www.agristudy.com](http://www.agristudy.com)) (verified with GENSTAT 16th  
305 Edition; VSN International, Hemel Hempstead, UK). Treatment means were separated using  
306 Fisher's protected LSD at  $P \leq 0.05$ .

307 For the second experiment, GR<sub>50</sub> (the dose required to kill 50% of the growth of  
308 plants) estimates were generated using Probit analysis [IBM SPSS Statistics 20.0 (SPSS,  
309 Inc., Chicago, IL, USA)]. The level of significance was tested with a Chi-Square goodness  
310 of fit test. When the calculated value of Chi-Square goodness of fit test was greater than the  
311 table value, the null hypothesis was rejected and it was concluded that there was a significant  
312 difference between the observed and the expected value and vice versa with values lower  
313 than the table value. The resistance index (resistance/susceptibility ratio) was calculated on  
314 the basis of the GR<sub>50</sub> value to compare the resistance level among different biotypes.

315

## 316 **Author Contributions**

317 Conceptualization: Gulshan Mahajan, Bhagirath Singh Chauhan

318 Data curation: Gulshan Mahajan, Vishavdeep Kaur

319 Formal analysis: Gulshan Mahajan, Vishavdeep Kaur

320 Funding acquisition: Bhagirath Singh Chauhan.

321 Methodology: Gulshan Mahajan.

322 Resources: Gulshan Mahajan, Bhagirath Singh Chauhan.

323 Writing – original draft: Gulshan Mahajan.

324 Writing – review & editing: Bhagirath Singh Chauhan, Michael Thompson

### 325 **Data Availability Statement**

326 All relevant data are within the paper and its Supporting Information files.

### 327 **Funding**

328 Not any special funding was obtained for this work.

### 329 **Conflicts of Interest**

330 The authors declare no conflicts of interest.

331

### 332 **References**

333 1 Holm L.G., Plucknett D.L., Pancho J.V., Herberger J.P., The World's Worst Weeds.

334 Distribution and biology. Honolulu, University of Hawaii, 1977, 609 p.

335 2 Walker S.R., Taylor I.N., Milne G., Osten V.A., Hoque Z., Farquharson R.J., A survey of

336 management and economic impact of weeds in dryland cotton cropping systems of

337 subtropical Australia. Australian Journal of Experimental Agriculture, 2005. 45: p. 79-

338 91.

339 3 Friend E. Queensland weed seeds. Department of Primary Industries, 1983. p. 206 .

340 4 Rew L.J., Medd R.W., Van de Ven. R., Gavin J.J., Robinson G.R., Tuitee M., Barnes J.,

341 Walker S. Weed species richness, density and relative abundance on farms in the

342 subtropical grain region of Australia. Australian Journal of Experimental Agriculture,

343 2005. 45: p. 711-723.

344 5 Osten V.A., Walker S.R., Storrie A., Widderick M., Moylan P., Robinson G.R., Galea K.

345 Survey of weed flora and management relative to cropping practices in the north-

- 346 eastern grain region of Australia. *Australian Journal of Experimental Agriculture*, 2007.  
347 47: p. 57-70.
- 348 6 Llewellyn R., Ronning D., Clarke M., Mayfield A., Walker S., Ouzman J. Impact of weeds  
349 in Australian grain production. *Grains Research and Development Corporation*,  
350 Canberra, ACT, Australia, 2016. p. 112 .
- 351 7 Wu H., Walker S., Osten V., Taylor I., Sindel B. Emergence and persistence of barnyard  
352 grass (*Echinochloa colona* (L.) Link) and its management options in sorghum. In *Weed*  
353 *management: Balancing People, Planet, Profit. 14th Australian Weeds Conference,*  
354 *Wagga Wagga, New South Wales, Australia, 6-9 September 2004: Papers and*  
355 *Proceedings*
- 356 8 Nguyen T.H. Evolution and spread of glyphosate resistant barnyard grass (*Echinochloa*  
357 *colona* (L.) Link) from Australia. 2015. (Doctoral dissertation). p. 151.
- 358 9 Swanton C.J., Huang J.Z., Shrestha A., Tollenaar M., Deen W., Rahimian H. Effects of  
359 temperature and photoperiod on the phenological development of barnyard  
360 grass. *Agronomy Journal*, 2000. 92: p. 1125-1134.
- 361 10 Duke S.O., Baerson S.R., Rimando A.M. Glyphosate. *Encyclopedia of agrochemicals*.  
362 John Wiley & Sons, Inc. New York, USA, 2003.
- 363 11 Storrie A., Cook T., Boutsalis P., Penberthy D., Moylan P. Glyphosate resistance in  
364 awnless barnyard grass (*Echinochloa colona* (L.) Link) and its implications for  
365 Australian farming systems. 2008, 74 p. in R. D. van Klinken, et al. (2008) *Proceedings*  
366 *of the 16th Australian Weeds Conference*. Queensland Weeds Society, Brisbane,  
367 Queensland.
- 368 12 Heap I., Duke S.O. Overview of glyphosate-resistant weeds worldwide. *Pest Management*  
369 *Science*, 2018, 74: p. 1040-1049.

- 370 13 Norsworthy J.K., Talbert R.E., Hoagland R.E. Chlorophyll fluorescence for rapid  
371 detection of propanil-resistant barnyard grass (*Echinochloa crus-galli*). *Weed Science*,  
372 1998. 46: p. 163-169.
- 373 14 Beckie H.J. Herbicide-resistant weed management: focus on glyphosate. *Pest*  
374 *Management Science*, 2011. 67: p. 1037-1048.
- 375 15 Heap I. Global perspective of herbicide-resistant weeds. *Pest Management Science*, 2014.  
376 70: p. 1306-1315.
- 377 16 Caseley J.C., Coupland D. Environmental and plant factors affecting glyphosate uptake,  
378 movement and activity, in *The Herbicide Glyphosate*, ed. by Grossbard E and Atkinson  
379 D. Butterworth & Co., London, UK, 1985, p. 92–123.
- 380 17 Christoffers M.J. Genetic aspects of herbicide-resistant weed management. *Weed*  
381 *Technology*, 1999. 13: p. 647-652.
- 382 18 Délye C., Michel S., Bérard A., Chauvel B., Brunel D., Guillemin J.P., Dessaint F., Le  
383 Corre V. Geographical variation in resistance to acetyl-coenzyme A  
384 carboxylase-inhibiting herbicides across the range of the arable weed *Alopecurus*  
385 *myosuroides* (black-grass). *New Phytologist*, 2010. 186: p. 1005-1017.
- 386 19 Thill D.C., Mallory-Smith C.A. The nature and consequence of weed spread in cropping  
387 systems. *Weed Science*, 1997. 45:337-342.
- 388 20 Llewellyn R.S., Allen D.M. Expected mobility of herbicide resistance via weed seeds and  
389 pollen in a Western Australian cropping region. *Crop Protection*, 2006. 25: p. 520-526.
- 390 21 Christoffoleti P.J. Curvas de dose-resposta de biótipos resistente e suscetível de *Bidens*  
391 *pilosa* L. aos herbicidas inibidores da ALS. *Scientia Agricola*, 2002. 59: p. 513-519.
- 392 22 Mutti N.K., Mahajan G., Prashant J., Chauhan B.S. The response of glyphosate-resistant  
393 and glyphosate-susceptible biotypes of junglerice (*Echinochloa colona*) to mungbean  
394 interference. *Weed Science*, 2019. 67: p. 419-425.



- 395 23 Damalas C.A., Dhima K.V., Eleftherohorinos I.G. Morphological and physiological  
396 variation among species of the genus *Echinochloa* in Northern Greece. *Weed Science*,  
397 2008. 56: p. 416-423.
- 398 24 Chun J.C., Moody K. Differential competitiveness of *Echinochloa colona*  
399 ecotypes. *Korean Journal of Weed Science*, 1987. 7: p. 247-256.
- 400 25 Smith A.E. *Handbook of Weed Management Systems*. 1st edn. New York: CRC Press,  
401 1995. p. 758.
- 402 26 Thullen R.J., Keeley P.E. Seed production and germination in *Cyperus esculentus* and *C.*  
403 *rotundus*. *Weed Science*, 1979. 27: p. 502–505.
- 404 27 Tayo T. The analysis of the physiological basis of yield in oil seed rape (*Brassica napus*  
405 L.). 1974, Ph.D. thesis. University of Cambridge.
- 406 28 Meadley J.T., Milbourn G.M. The growth of vining peas: III. The effect of shading on  
407 abscission of flowers and pods. *Journal of Agricultural Science*, 1977. 77: p.103-108.
- 408 29 Neve P., Diggle A.J., Smith F.P., Powles S.B. Simulating evolution of glyphosate  
409 resistance in *Lolium rigidum* II: past, present and future glyphosate use in Australian  
410 cropping. *Weed Research*, 2003. 43: p. 418-427.
- 411 30 Powles S.B., Lorraine-Colwill D.F., Dellow J.J., Preston C. Evolved resistance to  
412 glyphosate in rigid ryegrass (*Lolium rigidum*) in Australia. *Weed Science*, 1998. 46: p.  
413 604–607.
- 414 31 Gaines T.A., Ward S.M., Bukun B., Preston C., Leach J.E., Westra P. Interspecific  
415 hybridization transfers a previously unknown glyphosate resistance mechanism in  
416 *Amaranthus* species. *Evolutionary Application*, 2012. 5: p. 29–38.
- 417 32 Shaner D.L., Lindenmeyer R.B., Ostlie M.H. What have the mechanisms of resistance to  
418 glyphosate taught us? *Pest Management Science*, 2012. 68: p. 3-9.

- 419 33 Preston C., Wakelin A.M., Dolman F.C., Bostamam Y., Boutsalis P. A decade of  
420 glyphosate-resistant *Lolium* around the world: mechanisms, genes, fitness, and  
421 agronomic management. *Weed Science*, 2009. 57: p. 435-441.
- 422 34 Binkholder K.M., Fresenburg B.S., Teuton T.C., Xiong X., Smeda R.J. Selection of  
423 glyphosate-resistant annual bluegrass (*Poa annua*) on a golf course. *Weed Science*,  
424 2011. 59: p. 286–289.
- 425 35 de Carvalho L.B., Cruz-Hipolito H., Gonzalez-Torralva F., da Costa Aguiar Alves P.L.,  
426 Christoffoleti P.J., de Prado R. Detection of sourgrass (*Digitaria insularis*) biotypes  
427 resistant to glyphosate in Brazil. *Weed Science*, 2011. 59: p. 171–176.
- 428 36 Dickson J.W., Scott R.C., Burgos N.R., Salas R.A., Smith K.L. Confirmation of  
429 glyphosate-resistant italian ryegrass (*Lolium perenne* ssp. multiflorum) in Arkansas.  
430 *Weed Technology*, 2011. 25: p. 674–679.
- 431 37 Light G.G., Mohammed M.Y., Dotray P.A., Chandler J.M., Wright R.J. Glyphosate-  
432 resistant common waterhemp (*Amaranthus rudis*) confirmed in Texas. *Weed*  
433 *Technology*, 2011. 25: p. 480–485.
- 434 38 Mueller T.C., Barnett K.A., Brosnan J.T., Steckel L.E. Glyphosate resistant goosegrass  
435 (*Eleusine indica*) confirmed in Tennessee. *Weed Science* 2011. 59: p. 562–566.
- 436 39 Norsworthy J.K., Riar D., Jha P., Scott R.C. Confirmation, control, and physiology of  
437 glyphosate-resistant giant ragweed (*Ambrosia trifida*) in Arkansas. *Weed Technology*,  
438 2011. 25: p. 430–435.
- 439 40 Riar D.S., Norsworthy J.K., Johnson D.B., Scott R.C., Bagavathiannan M. Glyphosate  
440 resistance in a johnsongrass (*Sorghum halepense*) biotype from Arkansas. *Weed*  
441 *Science*, 2011. 59: p. 299–304.
- 442 41 Alarcón-Reverte R., García A., Watson S.B., Abdallah I., Sabaté S., Hernández M.J.,  
443 Dayan F.E., Fischer A.J. Concerted action of target-site mutations and high EPSPS

444 activity in glyphosate-resistant junglerice (*Echinochloa colona*) from California. Pest

445 Management Science, 2015. 71: p. 996-1007.

446

447

**Table 1.** Morphological traits and seed production potential of different biotypes of *Echinochloa colona*

| <b>Biotype</b> | <b>Plant height (cm)</b> | <b>Tiller (number plant<sup>-1</sup>)</b> | <b>Leaf (number plant<sup>-1</sup>)</b> | <b>Seed head (number plant<sup>-1</sup>)</b> | <b>Seed head weight (g plant<sup>-1</sup>)</b> | <b>Shoot biomass (g plant<sup>-1</sup>)</b> | <b>Root biomass (g plant<sup>-1</sup>)</b> | <b>Days to seed head initiation (d)</b> | <b>Seed production (number plant<sup>-1</sup>)</b> |
|----------------|--------------------------|-------------------------------------------|-----------------------------------------|----------------------------------------------|------------------------------------------------|---------------------------------------------|--------------------------------------------|-----------------------------------------|----------------------------------------------------|
| B17/7          | 62.9                     | 47                                        | 134.7                                   | 52.7                                         | 7.7                                            | 24.8                                        | 12.7                                       | 42                                      | 7022                                               |
| B17/12         | 61.2                     | 47                                        | 163.6                                   | 63.9                                         | 7.5                                            | 24.2                                        | 13.0                                       | 41                                      | 8837                                               |
| B17/13         | 63.7                     | 50                                        | 156.3                                   | 59.4                                         | 8.5                                            | 25.1                                        | 18.0                                       | 40                                      | 10244                                              |
| B17/16         | 70.3                     | 40                                        | 124.1                                   | 53.5                                         | 9.8                                            | 27.3                                        | 10.1                                       | 45                                      | 6986                                               |
| B17/17         | 66.9                     | 41                                        | 134.5                                   | 60.5                                         | 8.1                                            | 22.7                                        | 9.7                                        | 42                                      | 7801                                               |
| B17/25         | 66.7                     | 30                                        | 132.1                                   | 36.6                                         | 6.2                                            | 22.1                                        | 13.7                                       | 45                                      | 5380                                               |
| B17/34         | 56.2                     | 43                                        | 192.1                                   | 62.9                                         | 7.9                                            | 20.9                                        | 12.5                                       | 44                                      | 9295                                               |
| B17/35         | 53.1                     | 39                                        | 185.9                                   | 65.1                                         | 6.2                                            | 20.9                                        | 16.1                                       | 48                                      | 6130                                               |
| B17/37         | 63.2                     | 43                                        | 162.1                                   | 59.0                                         | 7.5                                            | 21.1                                        | 12.4                                       | 43                                      | 6387                                               |
| B17/49         | 62.9                     | 52                                        | 165.7                                   | 63.7                                         | 9.9                                            | 25.4                                        | 11.9                                       | 44                                      | 8298                                               |
| LSD (0.05)     | 5.7                      | 7.0                                       | 30.5                                    | 14.2                                         | 1.7                                            | 3.8                                         | NS                                         | 2.7                                     | 2136                                               |

NS: nonsignificant

**Table 2.** Correlation of morphological traits with seed number in different biotypes of *Echinochloa colona*

| <b>Parameter</b>                              | <b>Plant height (cm)</b> | <b>Tiller (number plant<sup>-1</sup>)</b> | <b>Leaf (number plant<sup>-1</sup>)</b> | <b>Seed head (number plant<sup>-1</sup>)</b> | <b>Seed head weight (g)</b> | <b>Shoot biomass (g plant<sup>-1</sup>)</b> | <b>Root biomass (g plant<sup>-1</sup>)</b> | <b>Days to seed head initiation (d)</b> | <b>Seed production (number plant<sup>-1</sup>)</b> |
|-----------------------------------------------|--------------------------|-------------------------------------------|-----------------------------------------|----------------------------------------------|-----------------------------|---------------------------------------------|--------------------------------------------|-----------------------------------------|----------------------------------------------------|
| Tiller (number plant <sup>-1</sup> )          | 1                        |                                           |                                         |                                              |                             |                                             |                                            |                                         |                                                    |
| Leaf (number plant <sup>-1</sup> )            | 0.77*                    |                                           |                                         |                                              |                             |                                             |                                            |                                         |                                                    |
| Seed head (number plant <sup>-1</sup> )       | 0.55*                    | 0.77*                                     |                                         |                                              |                             |                                             |                                            |                                         |                                                    |
| Seed head weight (g plant <sup>-1</sup> )     | 0.59*                    | 0.87*                                     | 0.87*                                   |                                              |                             |                                             |                                            |                                         |                                                    |
| Seed head weight (g plant <sup>-1</sup> )     | 0.82*                    | 0.84*                                     | 0.51*                                   | 0.68*                                        |                             |                                             |                                            |                                         |                                                    |
| Shoot biomass (g plant <sup>-1</sup> )        | 0.96*                    | 0.88*                                     | 0.70*                                   | 0.72*                                        | 0.83*                       |                                             |                                            |                                         |                                                    |
| Root biomass (g plant <sup>-1</sup> )         | 0.36                     | 0.47*                                     | 0.52*                                   | 0.39                                         | 0.16                        | 0.47*                                       |                                            |                                         |                                                    |
| Days to seed head initiation (d)              | -0.54*                   | -0.65*                                    | -0.26                                   | -0.42                                        | -0.55*                      | -0.54*                                      | -0.16                                      |                                         |                                                    |
| Seed production (number plant <sup>-1</sup> ) | 0.66*                    | 0.88*                                     | 0.70*                                   | 0.78*                                        | 0.73*                       | 0.78*                                       | 0.53*                                      | -0.68*                                  | 1                                                  |

Critical value of  $r$  at 5% = 0.44; \* indicates significant relation

**Table 3.** Probit analysis detail [Intercept  $a + bx$  (covariate  $x$  are transformed using the base 10.0 logarithm)] for different *Echinochloa colona* biotypes

| <b>Biotype</b> | <b><i>a</i> Intercept</b> | <b><i>b</i> Estimate</b> | <b>Pearson<br/>Goodness- of-fit<br/><i>Chi square</i></b> | <b>Significance<br/>level<br/>(<i>Chi square</i>)</b> |
|----------------|---------------------------|--------------------------|-----------------------------------------------------------|-------------------------------------------------------|
| B17/7          | -9.23                     | 3.95                     | 0.95                                                      | 0.62                                                  |
| B17/12         | -9.37                     | 3.94                     | 3.98                                                      | 0.14                                                  |
| B17/13         | -9.25                     | 3.63                     | 2.42                                                      | 0.30                                                  |
| B17/16         | -1.55                     | 0.54                     | 0.78                                                      | 0.68                                                  |
| B17/17         | -7.76                     | 3.31                     | 1.10                                                      | 0.58                                                  |
| B17/25         | -13.8                     | 5.51                     | 0.01                                                      | 0.99                                                  |
| B17/34         | -5.25                     | 1.57                     | 5.68                                                      | 0.06                                                  |
| B17/35         | -2.94                     | 0.99                     | 5.48                                                      | 0.06                                                  |
| B17/37         | -3.11                     | 1.33                     | 3.19                                                      | 0.20                                                  |
| B17/49         | -4.41                     | 1.66                     | 3.25                                                      | 0.20                                                  |

bioRxiv preprint doi: <https://doi.org/10.1101/728592>; this version posted August 7, 2019. The copyright holder for this preprint (which was not certified by peer review) is the author/funder, who has granted bioRxiv a license to display the preprint in perpetuity. It is made available under aCC-BY 4.0 International license.

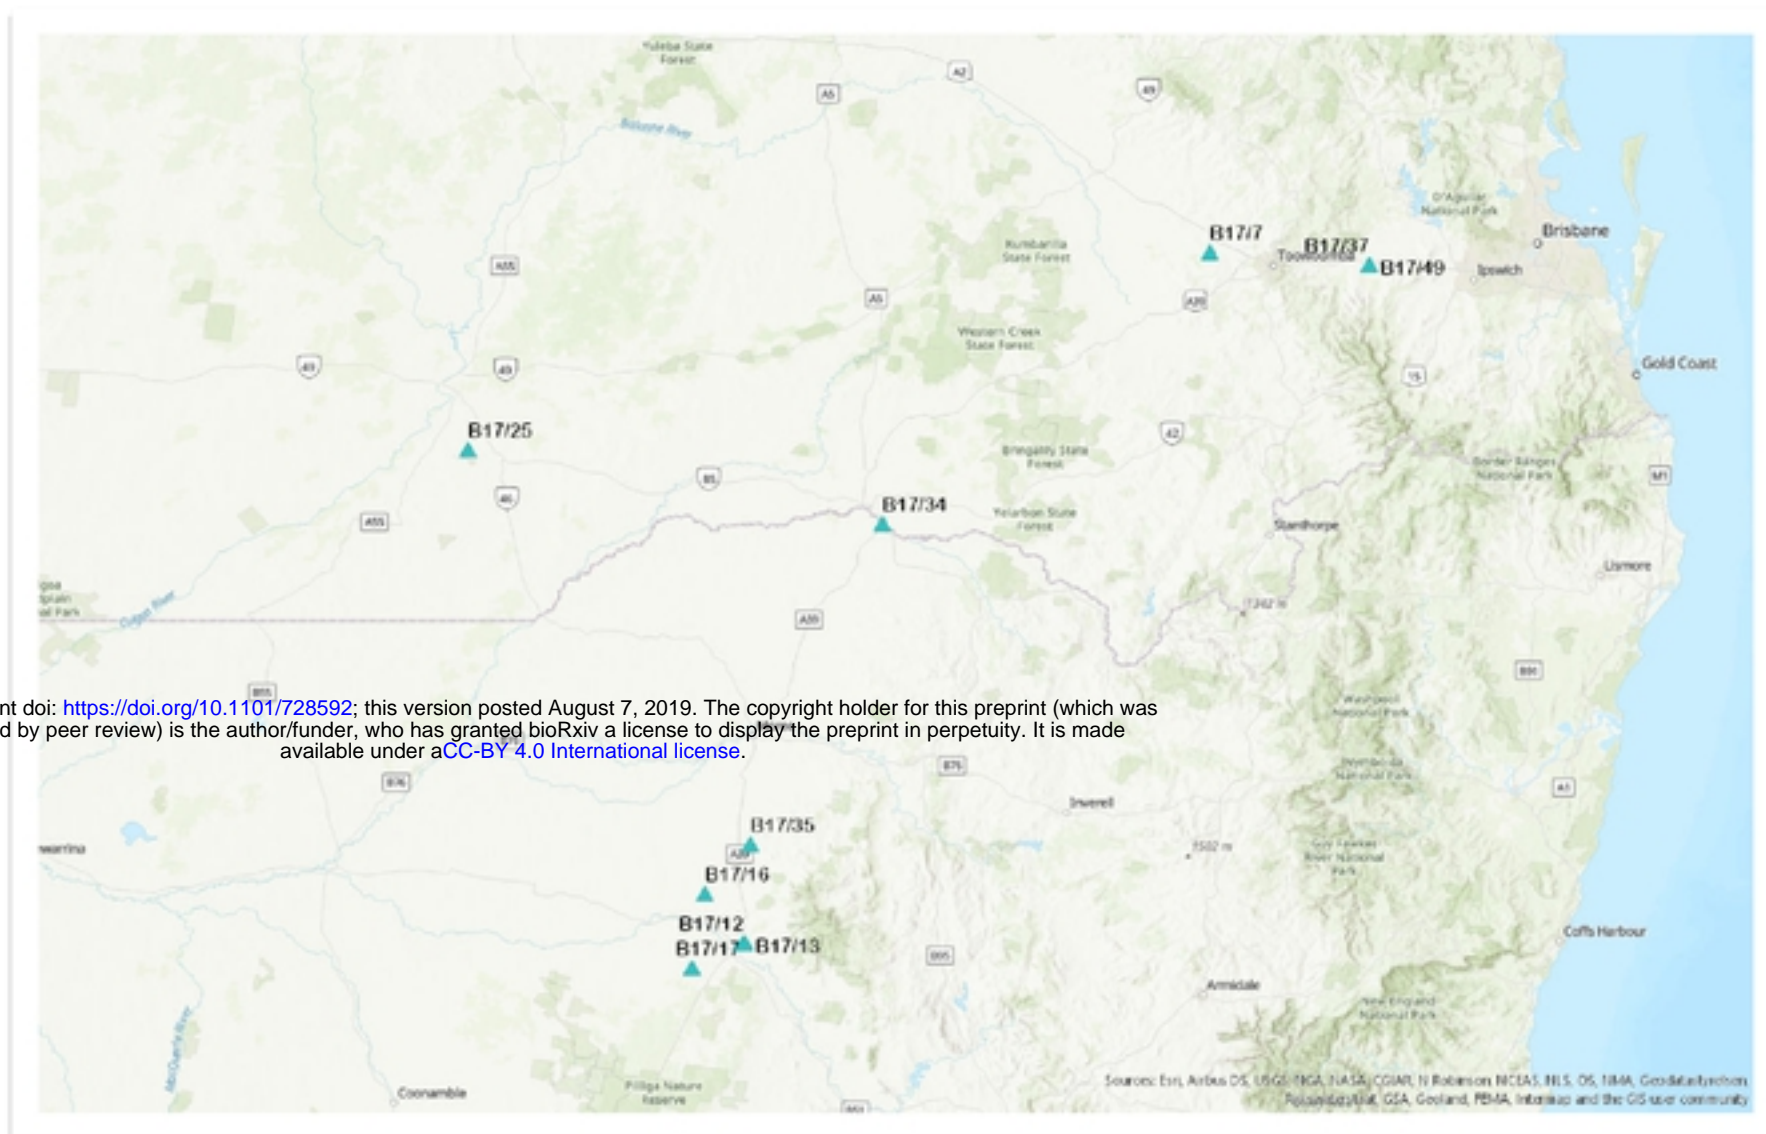

**Figure 1.** Location of 10 biotypes of *Echinochloa colona* selected from the northern grain region of Australia

bioRxiv preprint doi: <https://doi.org/10.1101/728592>; this version posted August 7, 2019. The copyright holder for this preprint (which was not certified by peer review) is the author/funder, who has granted bioRxiv a license to display the preprint in perpetuity. It is made available under aCC-BY 4.0 International license.

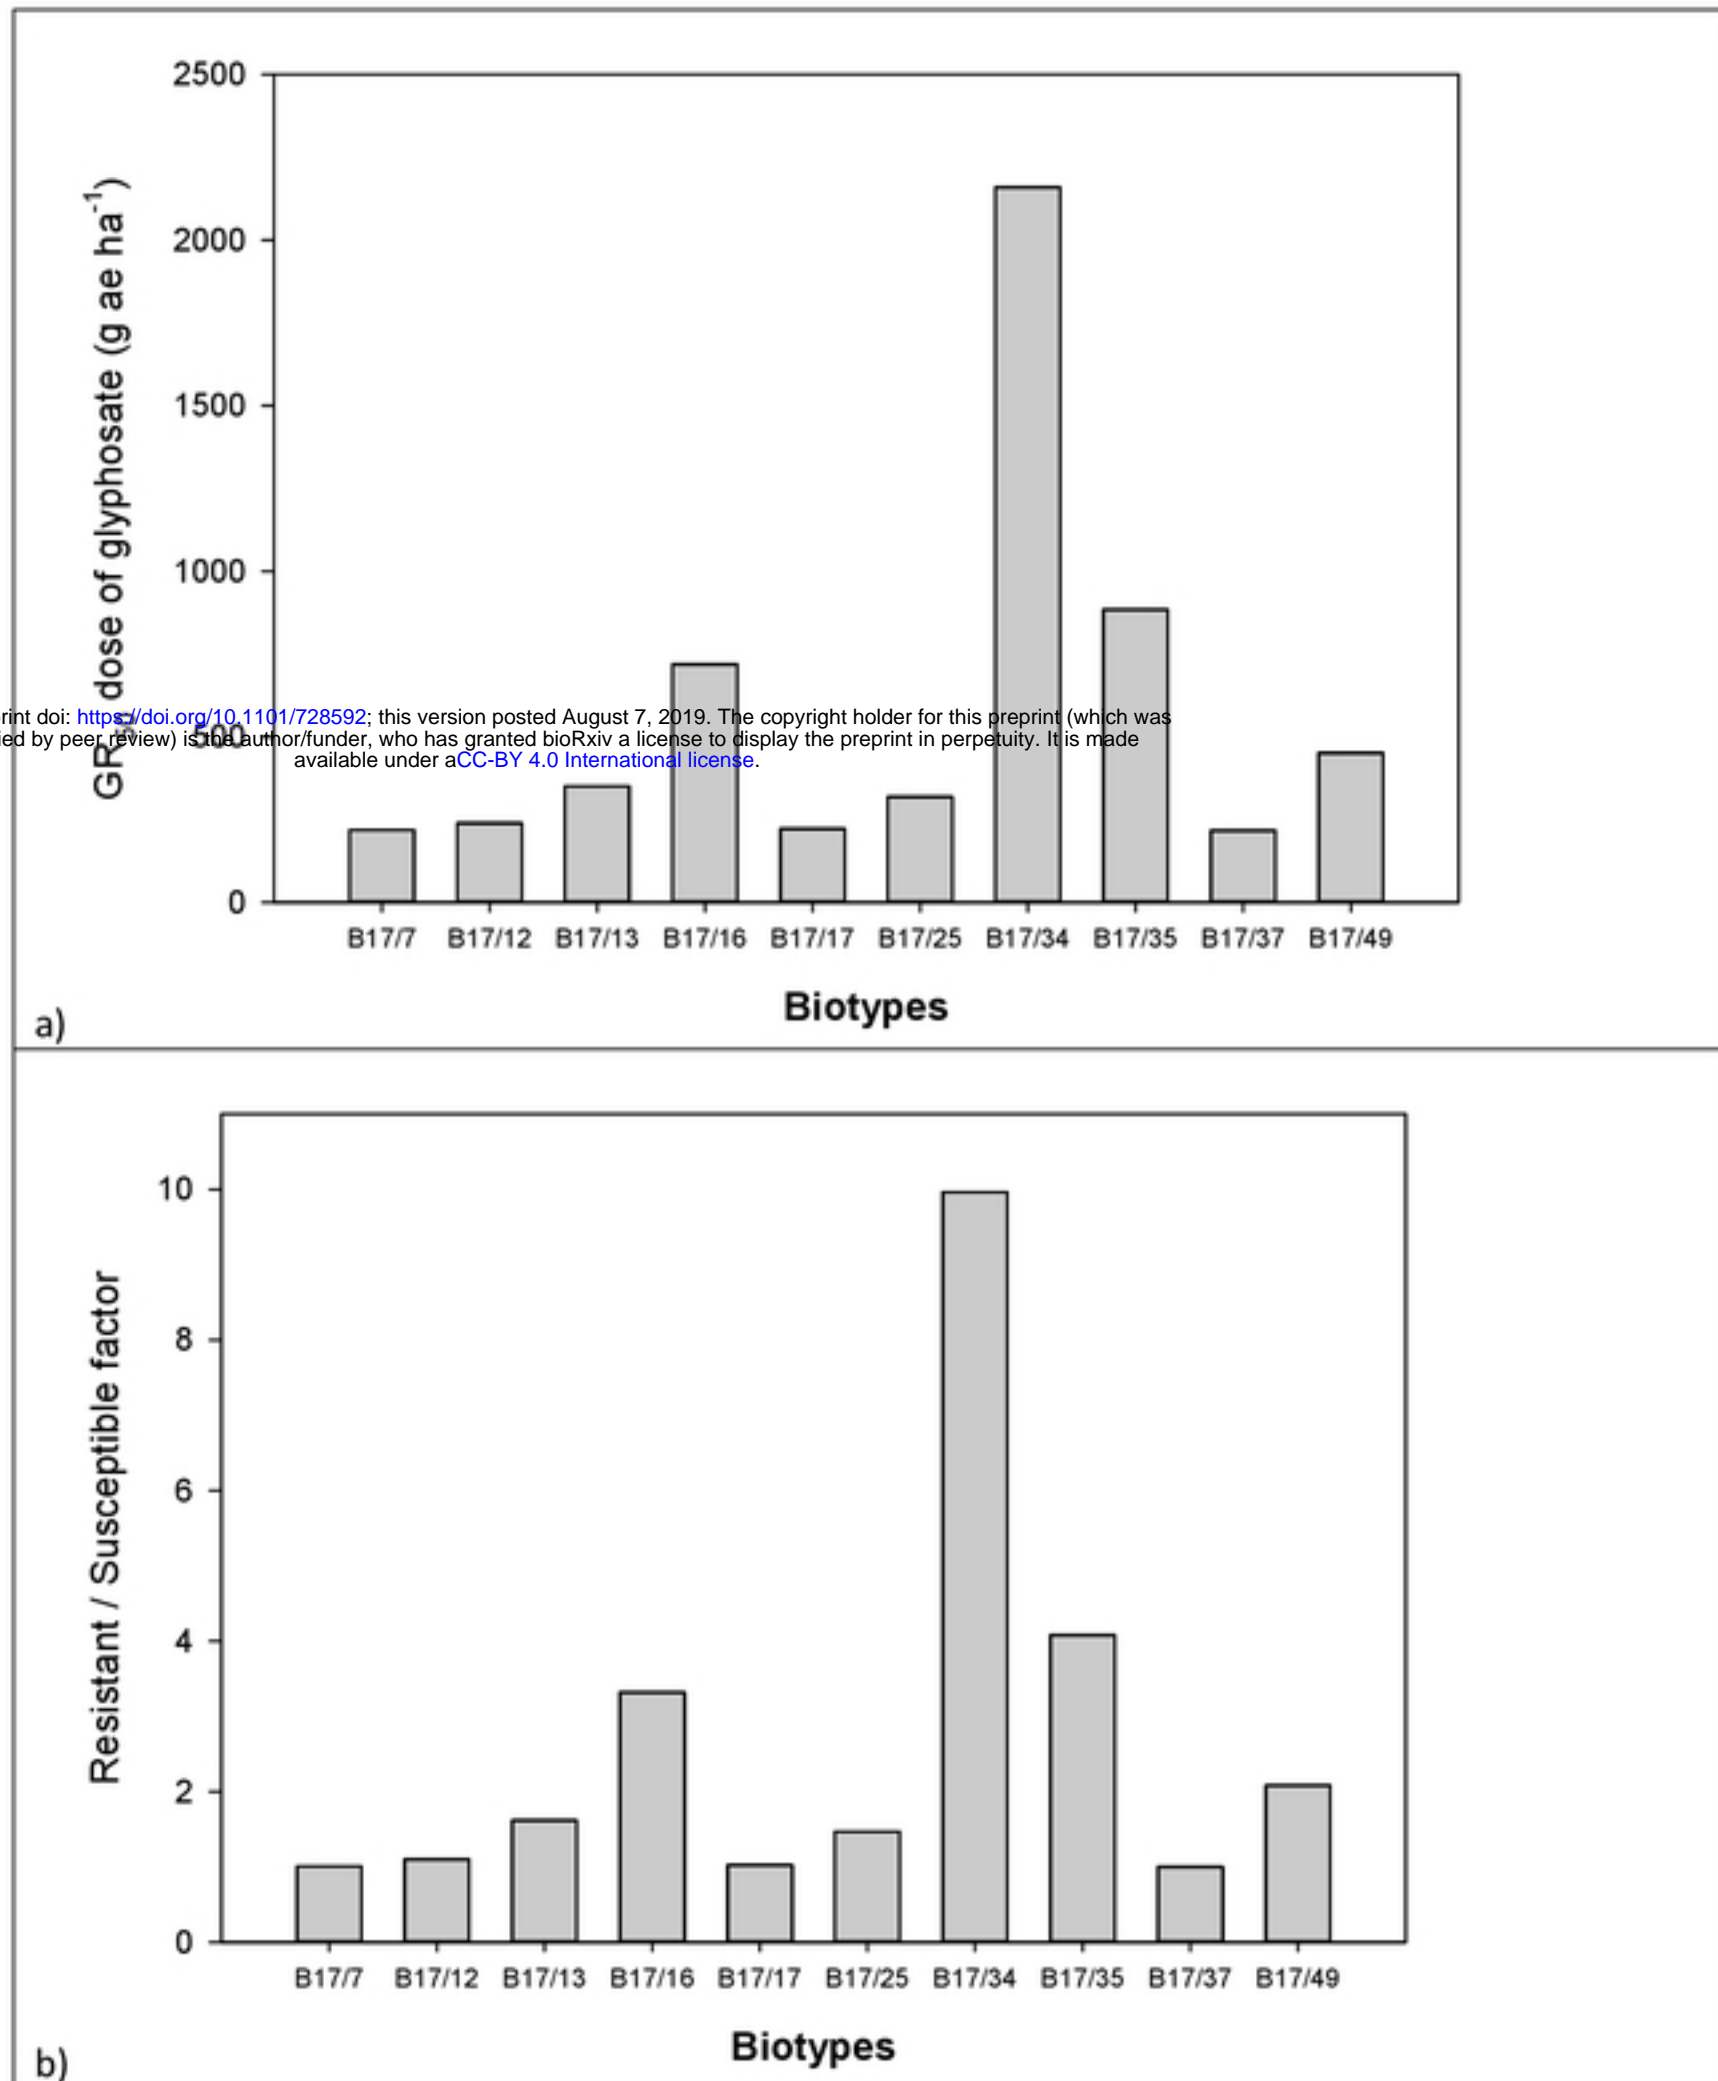

Figure 2: a) GR<sub>50</sub> dose of glyphosate and b) glyphosate-resistant/susceptible factor in different biotypes of *Echinochloa colona*.
